# Supplementary material
Source: publisher site journal article supplement (https://www.dovepress.com/get_supplementary_file.php?f=315986.docx)
Supplement: Supplementary file 1 [file get_supplementary_file.php]

| **Table S1 The comparison of arterial plaques group and no plaque group** | | | |
| --- | --- | --- | --- |
| **Variables** | **Arterial plaque (n=71)** | **No plaque (n=50)** | **P-value** |
| Age(years) | 57.45±10.48 | 45.58±13.74 | <0.001 |
| Gender(male) | 47(66.2%) | 35(70%) | 0.659 |
| Diabetes duration(years) | 5(1-10) | 3.5(0.65-8) | 0.098a |
| BMI(kg/m2) | 27.42±3.04 | 28.38±4.66 | 0.206 |
| Waist-to-hip ratio | 0.96±0.06 | 0.97±0.07 | 0.336 |
| White blood cells(109/L) | 6.57±1.87 | 6.66±1.8 | 0.795 |
| Lymphocytes(109/L) | 2.09±0.6 | 2.2±0.72 | 0.348 |
| Neutrophils(109/L) | 3.82±1.48 | 3.81±1.26 | 0.965 |
| Platelets(109/L) | 210.2±53.34 | 199.34±61.73 | 0.304 |
| ALT(U/L) | 21(16-44) | 34(22-58.5) | 0.008a |
| AST(U/L) | 17(14-29) | 21.5(18-35) | 0.023a |
| GGT(U/L) | 38(23-55) | 50(28-88) | 0.058a |
| Total bile acid(μmol/L) | 4.2(2.8-6.3) | 4.3(2.43-8) | 0.662a |
| Indirect bilirubin(μmol/L) | 7.8±3.05 | 10.26±4.89 | 0.002 |
| Direct bilirubin(μmol/L) | 3.41±1.29 | 4.56±2.67 | 0.007 |
| Blood urea nitrogen(mmol/L) | 5.4±1.48 | 5.22±1.46 | 0.505 |
| Uric Acid(mmol/L) | 0.34(0.28-0.42) | 0.37(0.3-0.45) | 0.115a |
| Serum creatinine(μmol/L) | 74.13±21.5 | 68.06±17.49 | 0.102 |
| eGFR(ml/min) | 97.91±26.7 | 113.31±26.64 | 0.002 |
| Total cholesterol(mmol/L) | 4.72±1.5 | 5.63±2.44 | 0.012 |
| Triglycerides(mmol/L) | 1.68(1.23-2.94) | 1.6(1.22-3.31) | 0.856a |
| HDL cholesterol(mmol/L) | 1.04±0.31 | 1.08±0.29 | 0.408 |
| LDL cholesterol(mmol/L) | 2.72±1.12 | 2.96±1.19 | 0.27 |
| ACR(mg/g) | 13(5-111) | 10.5(5-40.25) | 0.42a |
| Fasting plasma glucose(mmol/L) | 9.15±2.8 | 9.65±3.47 | 0.388 |
| 1h postprandial plasma glucose(mmol/L) | 15.94±3.85 | 16.14±4.12 | 0.776 |
| 2h postprandial plasma glucose(mmol/L) | 18.12±3.93 | 17.85±4.82 | 0.736 |
| Fasting insulin(mIU/L) | 12.2(7-18.6) | 12.45(7.05-18.13) | 0.912a |
| Fasting C-peptide(μg/L) | 2.43(1.79-3.15) | 2.47(1.44-3.21) | 0.998a |
| 1h postprandial insulin(mIU/L) | 26.8(17.1-56.2) | 25.75(11.18-45.48) | 0.299a |
| 1h postprandial C-peptide(μg/L) | 3.65(2.42-5.67) | 3.31(2.35-4.97) | 0.374a |
| 2 h postprandial insulin(mIU/L) | 29.3(15.3-53.3) | 25.8(13.18-59.45) | 0.381a |
| 2 h postprandial C-peptide(μg/L) | 4.71(3.3-7.02) | 4.59(2.99-6.52) | 0.427a |
| HOMA-IR | 4.53(3-8.02) | 5.1(3.1-9.24) | 0.902a |
| Hemoglobin A1c(%) | 9.54±1.89 | 9.6±2.3 | 0.883 |
| Neopetrin(ng/ml) | 1.99(1.52-2.61) | 1.81(1.49-2.29) | 0.286a |
| Abbreviations: BMI = body mass index; ALT =alanine aminotransferase; AST =aspartate aminotransferase; GGT=γ-glutamyl transpeptidase; eGFR = estimated glomerular filtration rate; HDL cholesterol = high-density lipoprotein cholesterol; LDL cholesterol = low-density lipoprotein cholesterol; ACR = urinary albumin-to-creatinine ratio. a: compared by the Mann-Whitney test. | | | |

| **Table S2 Multivariable logistic regression analysis for arterial plaques** | | |
| --- | --- | --- |
| **Parameters** | **OR (95% CI)** | **P-value** |
| Age | 1.086(1.037,1.138) | 0.001 |
| ALT | 1.024(0.984,1.066) | 0.237 |
| AST | 0.968(0.919,1.019) | 0.211 |
| Direct bilirubin | 0.42(0.229,0.769) | 0.005 |
| Indirect bilirubin | 1.189(0.931,1.519) | 0.165 |
| eGFR | 0.991(0.973,1.009) | 0.340 |
| Total cholesterol | 0.576(0.382,0.868) | 0.008 |
| Neopterin | 1.555(0.861,2.808) | 0.144 |

Abbreviations: OR = odds ratio; CI = confidence interval; ALT =alanine aminotransferase; AST =aspartate aminotransferase; eGFR = estimated glomerular filtration rate.

| **Table S3 The supplement information of carotid plaque group and no carotid plaque group** | | | |
| --- | --- | --- | --- |
| **Variables** | **Carotid plaque (n=48)** | **No carotid plaque (n=73)** | **P-value** |
| White blood cells(109/L) | 6.90±1.91 | 6.41±1.77 | 0.154 |
| Lymphocytes(109/L) | 2.19±0.55 | 2.10±0.71 | 0.421 |
| Neutrophils(109/L) | 4.01±1.59 | 3.68±1.23 | 0.205 |
| Platelets(109/L) | 217.98±54.34 | 197.64±57.57 | 0.054 |
| ALT(U/L) | 21(16-44) | 31(18-50.5) | 0.109a |
| AST(U/L) | 18(14-30.5) | 21(16-30) | 0.135a |
| GGT(U/L) | 39.5(26-51) | 45(23.5-73.5) | 0.419a |
| Total bile acid(μmol/L) | 4.2(2.78-5.88) | 4.3(2.6-6.9) | 0.732a |
| Blood urea nitrogen(mmol/L) | 5.43±1.34 | 5.26±1.55 | 0.543 |
| Uric Acid(mmol/L) | 0.35(0.29-0.42) | 0.35(0.28-0.45) | 0.742a |
| Abbreviations: ALT =alanine aminotransferase; AST =aspartate aminotransferase; GGT=γ-glutamyl transpeptidase. a: compared by the Mann-Whitney test. | | | |

| **Table S4 The supplement information of** **femoral plaque group and no femoral plaque group** | | | |
| --- | --- | --- | --- |
| **Variables** | **Femoral plaque (n=52)** | **No femoral plaque (n=69)** | **P-value** |
| White blood cells(109/L) | 6.61±1.91 | 6.60±1.79 | 0.997 |
| Lymphocytes(109/L) | 2.11±0.66 | 2.16±0.65 | 0.639 |
| Neutrophils(109/L) | 3.84±1.47 | 3.79±1.34 | 0.868 |
| Platelets(109/L) | 207.96±57.21 | 204.01±57.14 | 0.708 |
| ALT(U/L) | 19.5(15-38.75) | 34(21-58) | 0.001a |
| AST(U/L) | 17(14-24.75) | 21(16.5-35) | 0.011a |
| GGT(U/L) | 36.5(21.5-51) | 46(28.5-85.5) | 0.024a |
| Total bile acid(μmol/L) | 4.2(3.03-5.75) | 4.2(2.35-8.2) | 0.622a |
| Blood urea nitrogen(mmol/L) | 5.35±1.51 | 5.31±1.45 | 0.859 |
| Uric Acid(mmol/L) | 0.35(0.29-0.42) | 0.35(0.29-0.45) | 0.597a |
| Abbreviations: ALT =alanine aminotransferase; AST =aspartate aminotransferase; GGT=γ-glutamyl transpeptidase. a: compared by the Mann-Whitney test. | | | |

**Table S5 Multivariable logistic regression analysis for femoral plaques**

| **Parameters** | **OR (95% CI)** | **P-value** |
| --- | --- | --- |
| Age | 1.065(1.017,1.115) | 0.007 |
| Diabetes duration | 1.012(0.938,1.091) | 0.766 |
| ALT | 1.01(0.967,1.055) | 0.658 |
| AST | 0.954(0.888,1.024) | 0.191 |
| GGT | 0.999(0.987,1.012) | 0.881 |
| Indirect bilirubin | 0.938(0.835,1.053) | 0.277 |
| Total cholesterol | 0.822(0.633,1.069) | 0.144 |
| Neopterin | 1.223(0.783,1.909) | 0.377 |

Abbreviations: OR = odds ratio; CI = confidence interval; ALT =alanine aminotransferase; AST =aspartate aminotransferase; GGT=γ-glutamyl transpeptidase.

| **Table S6 Correlation of neopterin levels and other clinical variables** | | |
| --- | --- | --- |
| **Parameters** | **Neopterin** | |
| **rs** | **P-value** |
| Age | -0.028 | 0.762 |
| Gender | 0.167 | 0.066 |
| Diabetes duration | 0.079 | 0.388 |
| Waist-to-hip ratio | 0.132 | 0.15 |
| White blood cells | -0.047 | 0.612 |
| Lymphocytes | -0.161 | 0.078 |
| Neutrophils | 0 | 0.997 |
| Platelets | -0.055 | 0.552 |
| Indirect bilirubin | -0.129 | 0.159 |
| Direct bilirubin | -0.066 | 0.469 |
| ALT | -0.062 | 0.498 |
| AST | 0.02 | 0.829 |
| GGT | -0.044 | 0.631 |
| Total bile acid | 0.044 | 0.63 |
| Blood urea nitrogen | 0.105 | 0.251 |
| Uric acid | 0.141 | 0.123 |
| Total cholesterol | 0.066 | 0.472 |
| Triglycerides | 0.037 | 0.689 |
| HDL cholesterol | -0.078 | 0.397 |
| LDL cholesterol | 0.027 | 0.768 |
| ACR | 0.143 | 0.116 |
| Fasting plasma glucose | 0.042 | 0.651 |
| 1h postprandial plasma glucose | 0.048 | 0.598 |
| 2h postprandial plasma glucose | 0.156 | 0.088 |
| Fasting insulin | 0.149 | 0.103 |
| Fasting C-peptide | 0.039 | 0.672 |
| 1h postprandial insulin | 0.051 | 0.576 |
| 1h postprandial C-peptide | 0.017 | 0.851 |
| 2h postprandial insulin | -0.017 | 0.855 |
| 2h postprandial C-peptide | -0.044 | 0.632 |
| Hemoglobin A1c | 0.014 | 0.876 |

Abbreviations: ALT =alanine aminotransferase; AST =aspartate aminotransferase; GGT=γ-glutamyl transpeptidase; HDL cholesterol = high-density lipoprotein cholesterol; LDL cholesterol = low-density lipoprotein cholesterol; ACR = urinary albumin-to-creatinine ratio.
